# Supplementary material for: Progressive Lameness of a Greater One-Horned Rhinoceros (Rhinoceros unicornis) Associated with a Retroperitoneal Abscess and Thrombus Caused by Streptococcus dysgalactiae Subspecies equisimilis
Source: MDPI journal article supplement (doi:10.3390/ani12141784), 2022-07-12
Supplement: s1 [file s1]

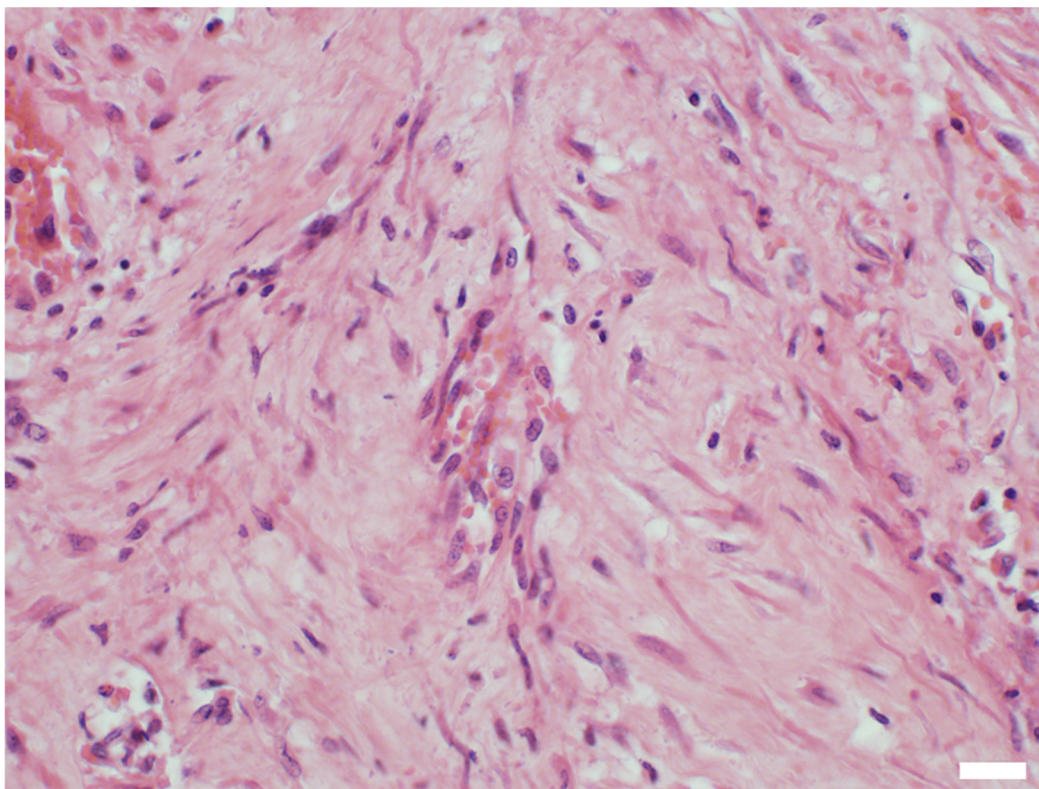

**Figure S1.** The typical structure of the vascular wall was replaced by granulation tissue with perpendicularly aligned neovascularization.
